# Supplementary material
Source: Springer Nature journal article supplement (https://www.springermedizin.de/resource/supplementary/12884_2009_281_MOESM2_ESM.pdf/9457366)

**A**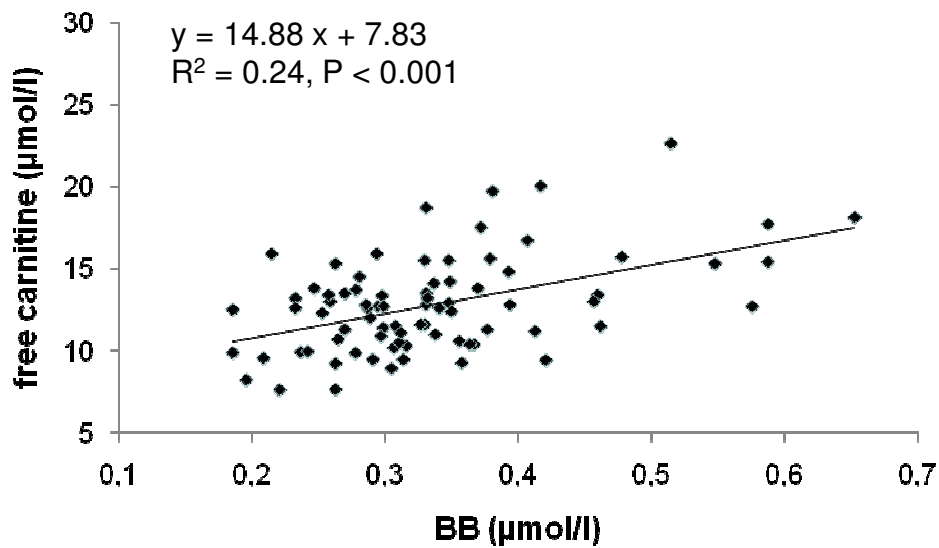**B**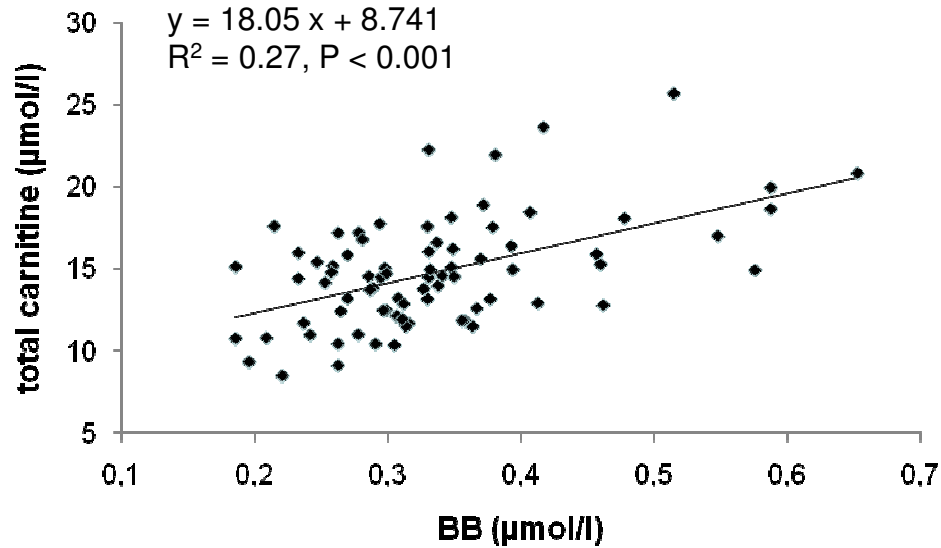**C**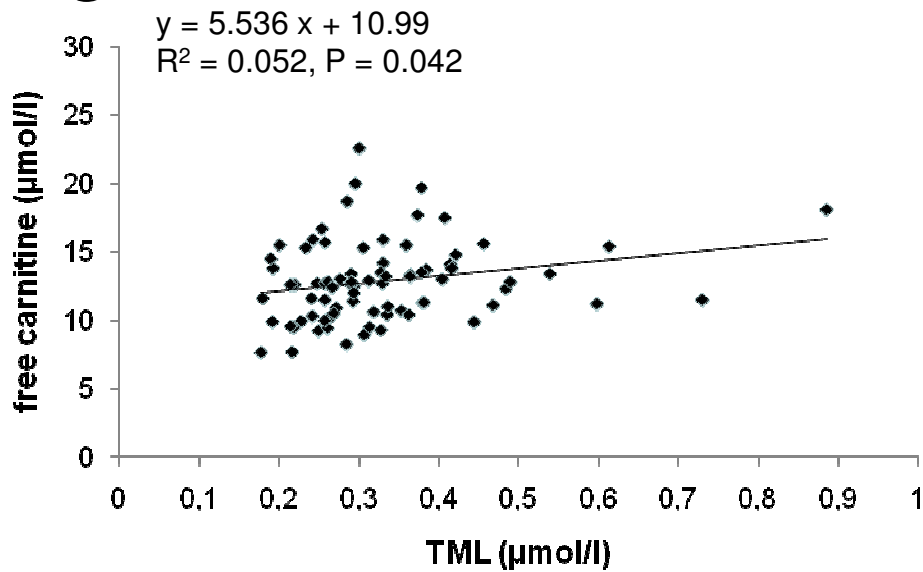**D**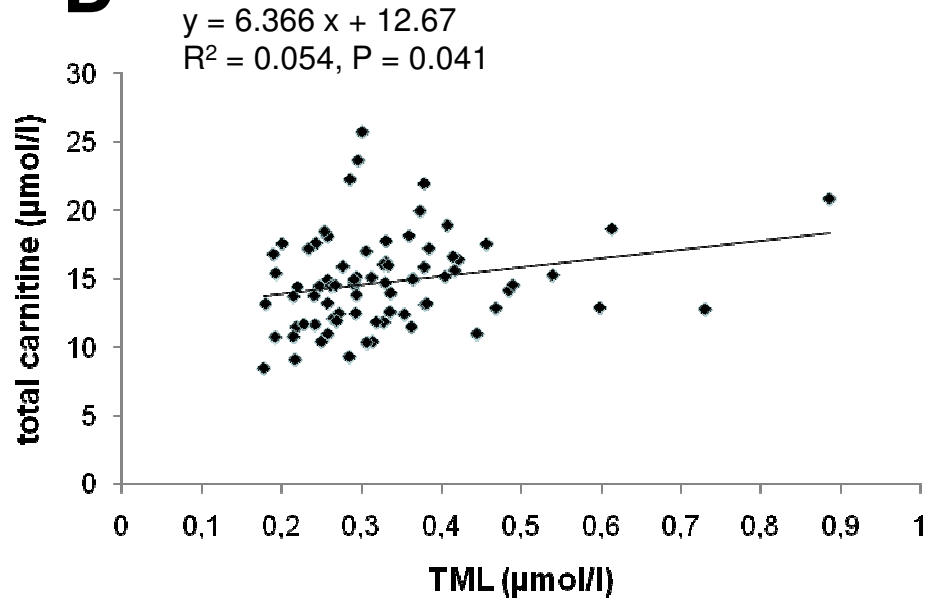

Supplement: MOESM2 [file 9457366]
